# Supplementary material
Source: PubMed Central journal article supplement (PMC3134778)
Supplement: 97320630006303S1.pdf [file 97320630006303S1.pdf]

## Supplementary material:

**Table 1:** Mutations at catalytic triad of NS2B-NS3 complex

| NS2B-NS3 complex    | HIS 94 | ASP 118 | SER 176 |
|---------------------|--------|---------|---------|
| NS2B-NS3 $\Delta_1$ | ALA    | ALA     | ALA     |
| NS2B-NS3 $\Delta_2$ | ALA    | ALA     | CYS     |
| NS2B-NS3 $\Delta_3$ | ALA    | ASN     | ALA     |
| NS2B-NS3 $\Delta_4$ | ALA    | ASN     | CYS     |

**Table 2:** Hydrogen bonds formed before mutation

| H-bond | Residue 1 (B1) | Atom | Residue 2 (B2) | Atom | B1-B2 distance (Å) |
|--------|----------------|------|----------------|------|--------------------|
| 1      | 94 HIS         | N    | 118 ASP        | OD1  | 3.27               |
| 2      | 94 HIS         | N    | 118 ASP        | OD2  | 3.28               |
| 3      | 118 ASP        | N    | 115 VAL        | O    | 3.02               |
| 4      | 118 ASP        | N    | 114 SER        | O    | 2.70               |
| 5      | 179 SER        | N    | 176 SER        | O    | 3.19               |

**Table 3a:** Hydrogen bonds formed after mutation

| H-bonds | Residue 1 (B1) | Atom | Residue 2 (B2) | Atom | B1-B2 distance (Å) |
|---------|----------------|------|----------------|------|--------------------|
| 1       | 118 ASP        | N    | 115 VAL        | O    | 3.02               |
| 2       | 118 ASP        | N    | 114 SER        | O    | 2.70               |
| 3       | 179 SER        | N    | 176 SER        | O    | 3.19               |

**Table 3b:** RMSD values of the mutated models

| Mutants             | RMSD(Å) |
|---------------------|---------|
| NS2B-NS3 $\Delta_1$ | 15.952  |
| NS2B-NS3 $\Delta_2$ | 4.706   |
| NS2B-NS3 $\Delta_3$ | 4.798   |
| NS2B-NS3 $\Delta_4$ | 7.929   |

**Table 4:** Docking of the ligands (4-hydroxypanduratin A, Panduratin A and Ester) with NS2B-NS3 complex

| Ligand                | Binding Energy (kcal/mol) | Number of Hydrogen bonds | Inhibitory Constant ( $\mu$ M) | Interacting with catalytic triad (His 94, Asp 118, Ser 176) |
|-----------------------|---------------------------|--------------------------|--------------------------------|-------------------------------------------------------------|
| 4-hydroxypanduratin A | -5.44                     | 2                        | 103.73                         | Yes                                                         |
| Panduratin A          | -5.76                     | 2                        | 60.26                          | No                                                          |
| Ester                 | -4.27                     | 4                        | 740.49                         | No                                                          |
